# Supplementary material for: Comparing the mechanical energetics of walking among individuals with unilateral transfemoral limb loss using socket and osseointegrated prosthetic interfaces
Source: Springer Nature journal article supplement (doi:10.1038/s41598-025-93211-1), 2025-03-21
Supplement: MOESM1 [file 41598_2025_93211_MOESM1_ESM.pdf]

**S1 - Cross-participant ensemble averaged A) anteroposterior ground reaction forces with (B) associated peak anterior and posterior forces across slow (0.6-1.1 m s<sup>-1</sup>) and fast (1.1-1.6 m s<sup>-1</sup>) walking speeds for socket and OI interfaces. Shaded regions and error bars represent  $\pm 1$  s.d. Values were normalized to each participant's body mass. Significant effects ( $P < 0.050$ ) of interface, speed, and interface-speed interaction were determined using two-way repeated measures ANOVAs and are graphically represented as an osseointegrated femur, speedometer, and their interaction. Statistical results of pairwise comparisons are reported in text.**

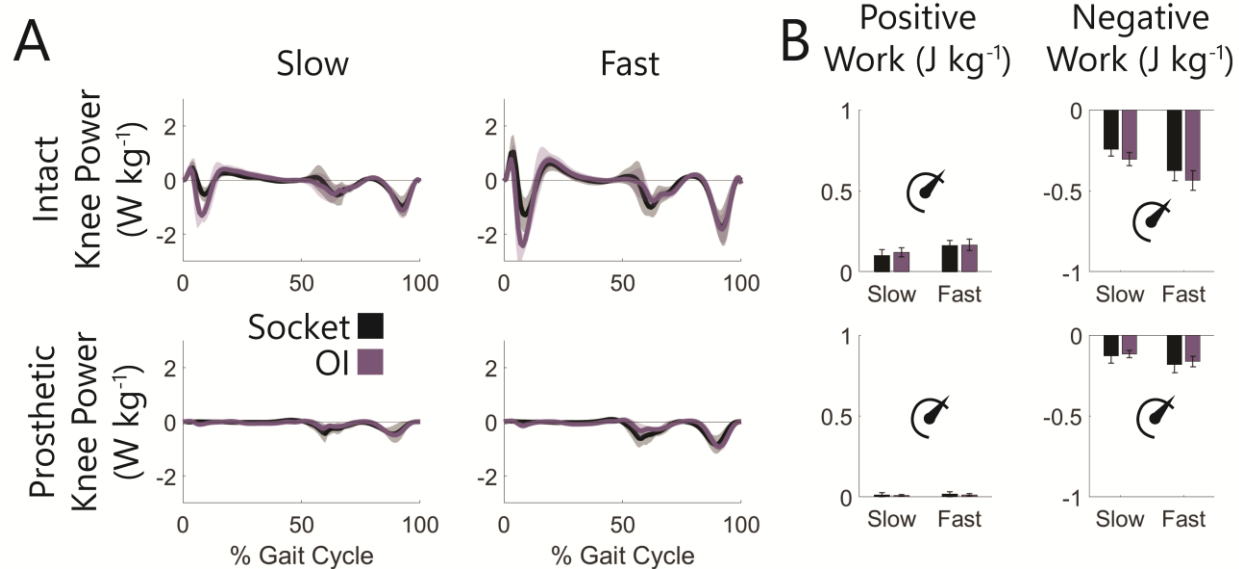

**S2 – Across-participant ensemble averaged A) knee powers with (B) associated positive and negative mean work values across slow ( $0.6\text{--}1.1\text{ m s}^{-1}$ ) and fast ( $1.1\text{--}1.6\text{ m s}^{-1}$ ) walking speeds for socket and OI interfaces. Shaded regions and error bars represent  $\pm 1$  s.d. Values were normalized to each participant's body mass. Significant effects ( $P < 0.050$ ) of interface, speed, and interface-speed interaction were determined using two-way repeated measures ANOVAs and are graphically represented as an osseointegrated femur, speedometer, and their interaction. Statistical results of pairwise comparisons are reported in text.**

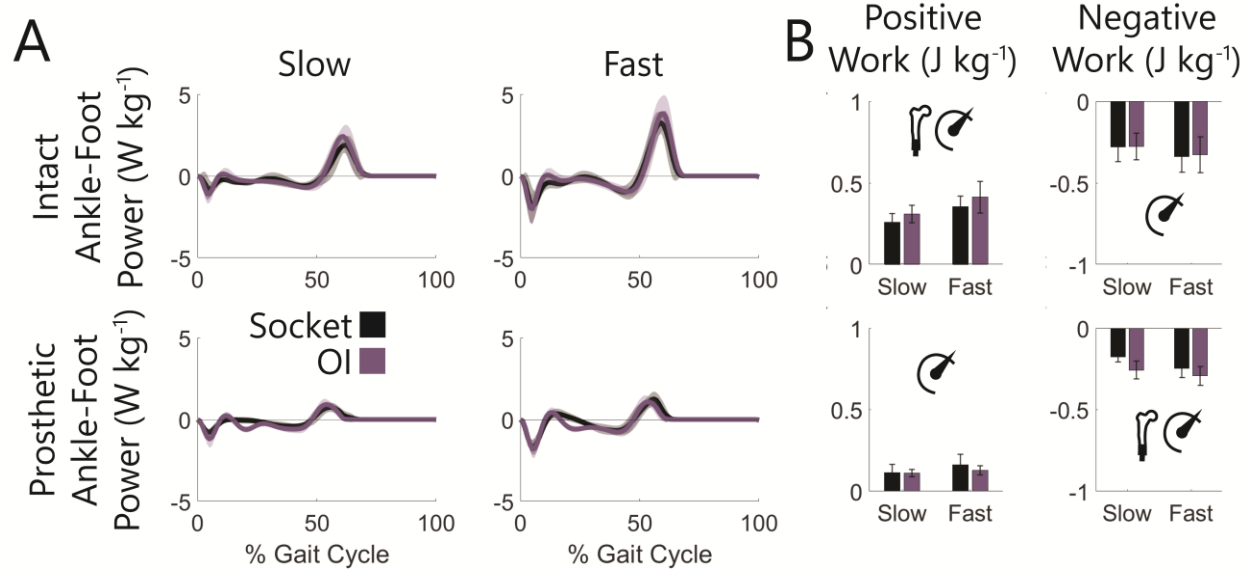

**S3 – Across-participant ensemble averaged A) ankle-foot powers with (B) associated positive and negative mean work values across slow ( $0.6\text{--}1.1 \text{ m s}^{-1}$ ) and fast ( $1.1\text{--}1.6 \text{ m s}^{-1}$ ) walking speeds for socket and OI interfaces. Shaded regions and error bars represent  $\pm 1$  s.d. Values were normalized to each participant's body mass. Significant effects ( $P < 0.050$ ) of interface, speed, and interface-speed interaction were determined using two-way repeated measures ANOVAs and are graphically represented as an osseointegrated femur, speedometer, and their interaction.**

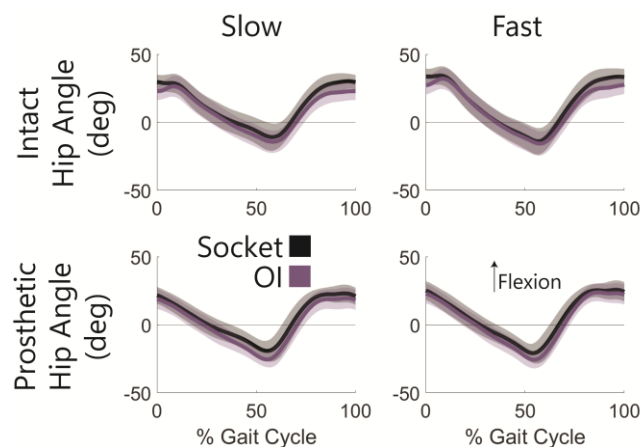

**S4 – Across-participant ensemble averaged sagittal hip angles across slow ( $0.6\text{--}1.1 \text{ m s}^{-1}$ ) and fast ( $1.1\text{--}1.6 \text{ m s}^{-1}$ ) walking speeds for socket and OI interfaces. Shaded regions represent  $\pm 1$  s.d.**

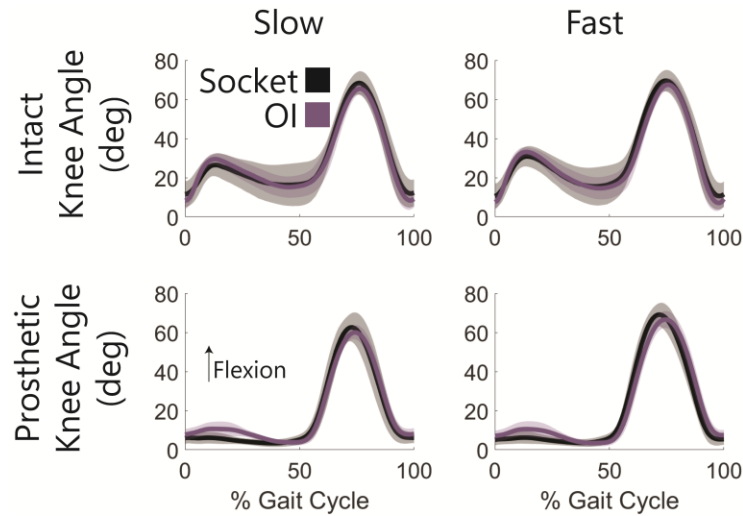

**S5 – Across-participant ensemble averaged sagittal knee angles across slow ( $0.6\text{--}1.1\text{ m s}^{-1}$ ) and fast ( $1.1\text{--}1.6\text{ m s}^{-1}$ ) walking speeds for socket and OI interfaces. Shaded regions represent  $\pm 1$  s.d.**

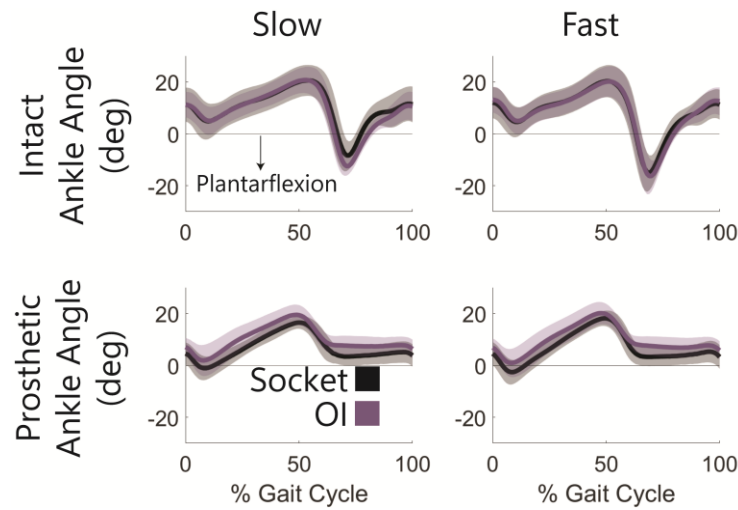

**S6 - Across-participant ensemble averaged sagittal ankle angles across slow ( $0.6\text{--}1.1\text{ m s}^{-1}$ ) and fast ( $1.1\text{--}1.6\text{ m s}^{-1}$ ) walking speeds for socket and OI interfaces. Shaded regions represent  $\pm 1$  s.d.**
